# Supplementary material
Source: PubMed Central journal article supplement (PMC6724537)

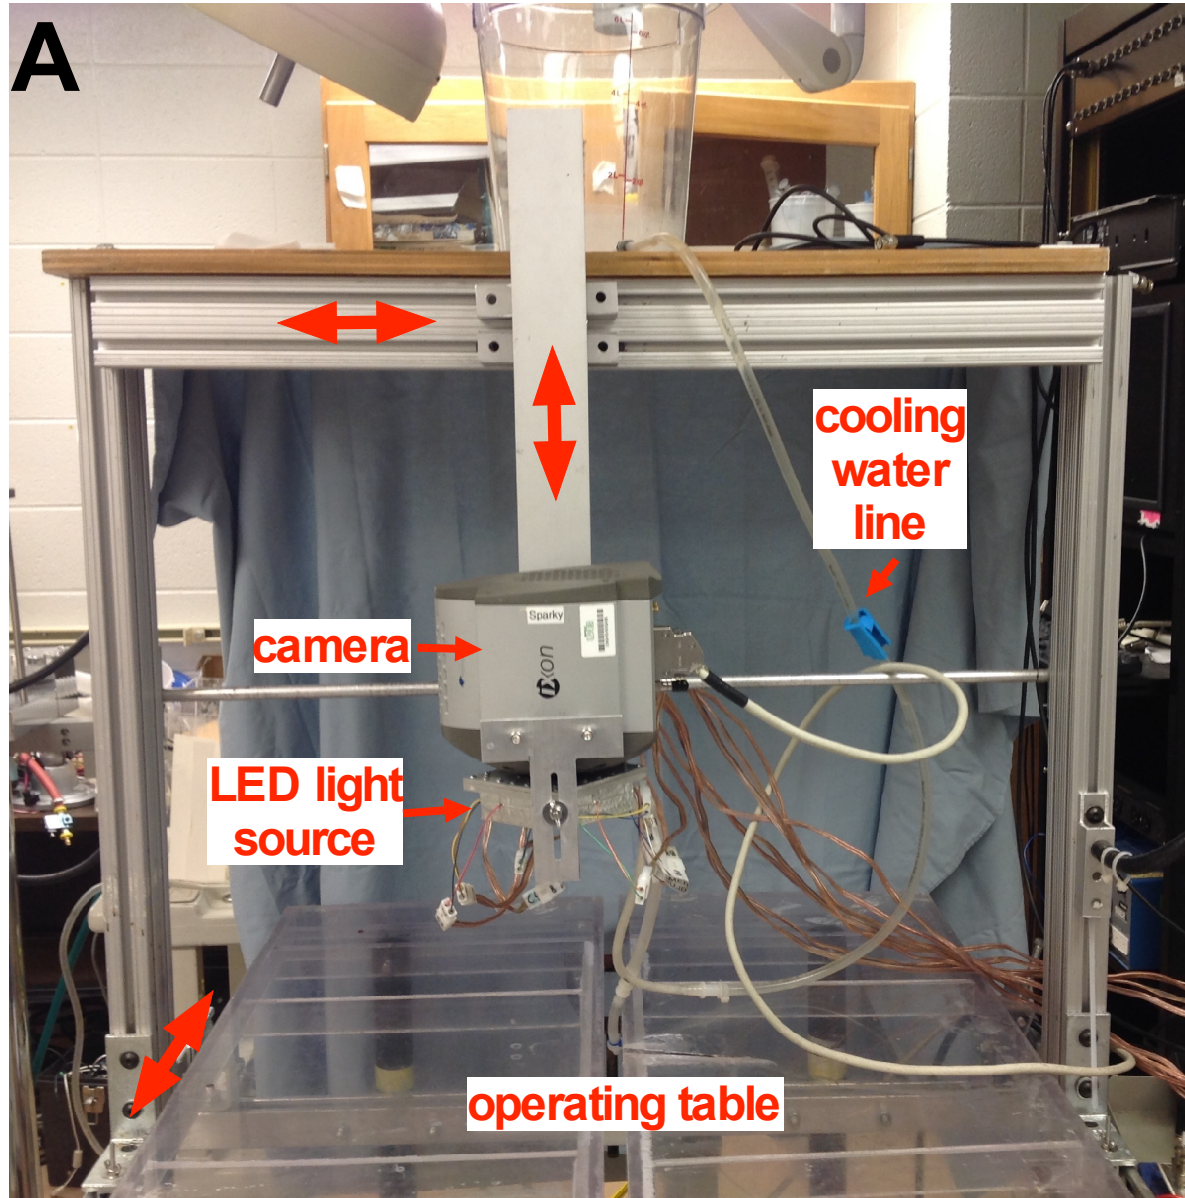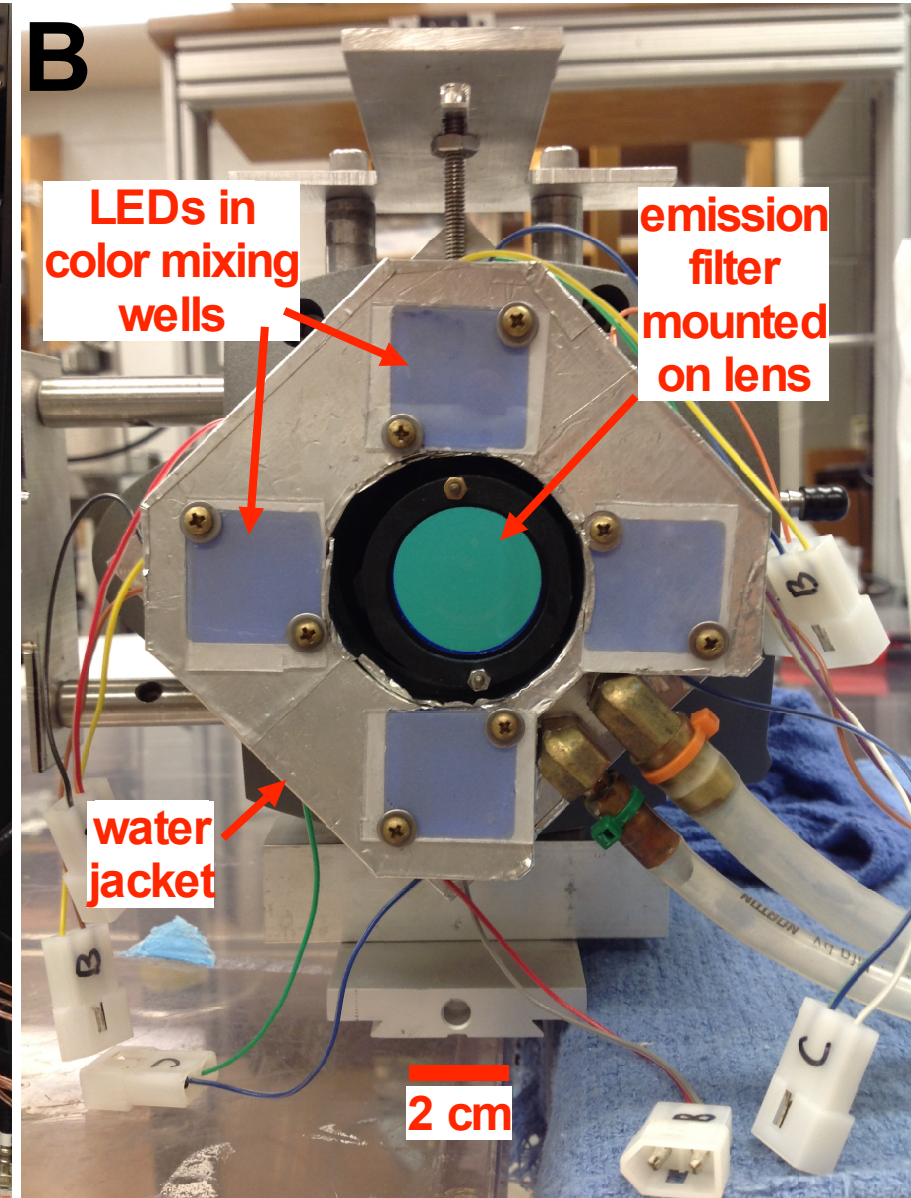

Supplement: NIHMS1048485-supplement-Supplemental_1_setup_photos.pdf [file NIHMS1048485-supplement-Supplemental_1_setup_photos.pdf]
